# COVID-19 anxiety among frontline nurses: predictive role of organisational support, personal resilience and social support

## Abstract

**Aim:** This study examines the relative influence of personal resilience, social support and organisational support in reducing COVID-19 anxiety in frontline nurses.

**Background:** Anxiety related to the COVID-19 pandemic is prevalent in the nursing workforce, potentially affecting nurses' well-being and work performance. Identifying factors that could help maintain mental health and reduce coronavirus-related anxiety among frontline nurses is imperative. Currently, no studies have been conducted examining the influence of personal resilience, social support and organisational support in reducing COVID-19 anxiety among nurses.

**Methods:** This cross-sectional study involved 325 registered nurses from the Philippines using four standardised scales.

**Results:** Of the 325 nurses in the study, 123 (37.8%) were found to have dysfunctional levels of anxiety. Using multiple linear regression analyses, social support ( $\beta = -0.142, p = 0.011$ ), personal resilience ( $\beta = -0.151, p = 0.008$ ) and organisational support ( $\beta = -0.127, p = 0.023$ ) predicted COVID-19 anxiety. Nurse characteristics were not associated with COVID-19 anxiety.

**Conclusions:** Resilient nurses and those who perceived higher organisational and social support were more likely to report lower anxiety related to COVID-19.

**Implication for Nursing Management:** COVID-19 anxiety may be addressed through organisational interventions, including increasing social support, assuring adequate organisational support, providing psychological and mental support services and providing resilience-promoting and stress management interventions.

**Keywords:** COVID-19, coronavirus, nursing, resilience, social support, organizational support, pandemic

## Introduction

The coronavirus disease 2019 (COVID-19) pandemic is a substantial health burden that has major implications for public health globally. COVID-19 is a pneumonia-like disease caused by a novel coronavirus that emerged in the Province of Wuhan in China in November 2019. Worldwide, confirmed cases of the disease had reached 9,289,255 as of June 25, 2020, while in the Western Pacific Region, the confirmed cases climbed to 206,948. Moreover, at this time there were 478,160 confirmed deaths and confirmed cases had been reported in more than 200 countries. The USA, Brazil, Russia, and India remained the countries with highest numbers of confirmed cases, accounting for 49% of all confirmed cases globally (WHO, 2020). Of the confirmed cases worldwide, 6%, or 90,000, were in healthcare workers. In the Philippines, since January 2020, the number of confirmed cases of COVID-19 has climbed to 31,826, with 22,197 active cases and 1,186 confirmed fatalities. The country's health agency identified 2,736 healthcare workers who contracted the disease, of whom 1,006 were nurses (Department of Health, 2020).

In a short span of time, COVID-19 has proven to be a fatal disease that has caused serious damage to the health and economy of the Philippines. The emergence of COVID-19 exerted unprecedented pressure on the country's healthcare system and presented various challenges to its nursing workforce, potentially affecting their work performance and mental health, and even putting their lives at risk.

## Review of Literature

Disease outbreaks such as the COVID-19 pandemic are anxiety-provoking situations. Defined as a “state of uneasiness or apprehension resulting from the anticipation of a real or perceived threatening event or situation” (Spielberger, 2010), anxiety is common among healthcare workers who are directly involved in managing affected patients during pandemics. Further, due to their direct contact with COVID-19 patients, healthcare workers (HCWs) are more exposed to traumatic events such as patients’ suffering and death (Pappa *et al.*, 2020), which could further amplify their fears and anxiety. Available data suggest that the prevalence of anxiety among HCWs ranged from 22.6% to 36.3% (Liu *et al.*, 2020), which was significantly higher than that of the general population. Among HCWs, nurses were reported to experience the highest anxiety levels and the highest prevalence of anxiety, ranging from 15% to 92% (Alwani *et al.*, 2020; Luo *et al.*, 2020; Zhu *et al.*, 2020). In several published studies, anxiety levels were found to be high, particularly among female nurses (Alwani *et al.*, 2020; Kaveh *et al.*, 2020).

The main source of anxiety in nurses during the COVID-19 pandemic was fear of becoming infected or unknowingly infecting others (Mo *et al.*, 2020). Shanafelt *et al.* (2020) identified other sources of anxiety in nurses, including lack of personal protective equipment (PPE), fear of harbouring the novel coronavirus at work, lack of access to COVID-19 testing, fear of transmitting the virus at work, doubt that their institution would support them if they became infected, lack of access to childcare facilities during lockdown, fear of being deployed in an unfamiliar ward or unit and lack of accurate information regarding the disease.

While a low level of anxiety is helpful to motivate and arouse excitement in an individual, persistent exposure to anxiety may have negative consequences on their physiological health and work performance. A vast number of studies have highlighted the

negative effects of a higher levels of anxiety, including loss of desire to eat, dizziness, sleep disturbance and vomiting or nausea (Lee, 2020; Lee *et al.*, 2020). Higher anxiety levels were also associated with impairment in some bodily functions, negative coping mechanisms (such as increased intake of alcohol or drugs), stress and depression and increased suicidal ideation (Lee *et al.*, 2020). Further, unmanaged anxiety may lead to long-term effects on nurses' work performance and job satisfaction, leading to frequent absenteeism and eventual turnover (Labrague *et al.*, 2018a; Lee *et al.*, 2020). Implementing measures to reduce anxiety among nurses may prevent its adverse consequences and is vital to sustain a well-engaged nursing workforce.

To effectively address nurses' anxiety or fears of COVID-19, it is vitally important to support their mental, psychological and emotional health through evidence-based measures (Mo *et al.*, 2020; Catton, 2020). Personal resilience and social and organisational support were identified in the literature as vital factors protecting against adversity and stress by nurses, allowing them to maintain their mental well-being and psychological health. A person's capacity to 'bounce back' or recover quickly from a specific event, such as the COVID-19 pandemic (Cooper *et al.*, 2020), along with support drawn from colleagues, managers, friends, families and the organisation (Maben & Bridges, 2020), may help nurses effectively endure the burden caused by the pandemic. However, no studies have yet been conducted to examine whether and/or how personal resilience, social support and organisational support contribute to the reduction of anxiety related to COVID-19. Hence, this study was conducted to assess the causal relationships between personal resilience, social support, organisational support and COVID-19 anxiety.

## Methods

### Research Design

A cross-sectional research design was adopted in this study.

### Samples and Settings

This study included full-time or contracted licensed registered nurses (RNs) who are currently employed in either public or private hospitals in the Philippines. To achieve an 80% power, with alpha set at 0.05 and small effect size set at 0.05 (Soper, 2020), a sample size of 293 nurses would be required, as determined using the G\*power program. A total of 350 nurses were initially invited to partake in the study; however, only 325 nurses responded (93% response rate).

### Instrumentation

Four standardised, self-reported scales were used for data collection: the COVID-19 Anxiety Scale, Brief Resilient Coping Scale (BRCS), the Perceived Social Support Questionnaire (PSSQ) and the Perceived Organizational Support (POS) questionnaire.

To assess or identify individuals who may have abnormal levels of anxiety related to the COVID-19 pandemic, the COVID-19 Anxiety Scale, which was designed and developed by Lee *et al.* (2020), was used. This scale contains 5 items that reflect the common symptoms of anxiety experienced by an individual and was originally designed to examine anxiety over COVID-19 in 775 adults in the USA. Nurses participating in the study indicated the frequency of symptoms experienced in a 5-point Likert-type scale (0 [not at all] to 4 [nearly every day]). The scale had an outstanding predictive validity and excellent reliability, with an internal consistency of 0.93 in a previous study (Lee *et al.*, 2020) and a Cronbach's alpha of 0.87 in the present study.

To examine nurses' ability to rebound from stressful events, the BRCS, which was developed by Smith *et al.* (2008), was utilised. To complete the BRCS, nurses indicated their

responses on each of the 4 items using a 5-point Likert-type scale (0 [does not describe me at all] to 5 [describes me very well]). The scale demonstrated an outstanding convergent and discriminatory validity and excellent reliability: its internal consistency was 0.91 in previous research (Smith *et al.*, 2008) and the Cronbach's alpha in the present study was 0.87.

To assess nurses' perceptions of the extent of support they receive from others when facing stressful situations, the PSSQ developed by Lin *et al.* (2019) was used. The PSSQ is a 6-item scale that the nurses answered by indicating the extent of their agreement on each item using a 5-point Likert-type scale (1 [strongly disagree] to 5 [strongly agree]). The scale had excellent criterion validity and reliability, with an internal consistency of 0.89 in a previous study (Lin *et al.*, 2019), while in the present study, the Cronbach's alpha was 0.87.

To assess nurses' opinions on the extent to which their workplace recognises and values their well-being, the POS scale, which was developed and designed by Eisenberger *et al.* (1986), was utilised. The POS is a 8-item scale in which nurses indicated the extent of their agreement on each item using a five-point Likert-type scale (1 [strongly disagree] to 5 [strongly agree]). The scale had an excellent criterion validity and excellent reliability, with an internal consistency of 0.93 in previous research (Eisenberger *et al.*, 1986) and a Cronbach's alpha of 0.87 in the present study.

## **Ethical Consideration and Data Collection**

Data collection using a questionnaire website platform was conducted after ethical clearance was granted by the Institutional Research Ethics Review Committee of Samar State University (IRERC EA-0012-I). Letters asking for permission to collect data were sought from the nurse executives of the selected hospitals a few days prior to the conduct of the study. After the potential participants were identified based on the inclusion criteria, a short orientation was

given, written consent was sought, and the questionnaires were handed to the participants in a sealed envelope by the researcher or research assistants. Participants were asked to complete the questionnaire during their break time so as not to disrupt their work.

## **Data Analysis**

Means, frequencies and standard deviations (SDs) were used to quantify the data. Nurse variables and key study variables were correlated to COVID-19 anxiety using Student's t-test, the Pearson correlation coefficient and analysis of variance. Variables that correlated significantly with the dependent variable were entered into the regression model (enter method) to identify potential predictors of COVID-19 anxiety. Data were considered statistically significant if the p-value for a particular statistical test was  $< 0.05$ . Data were analysed using version 23 of SPSS Statistics software for Windows 22.

## **Results**

A total of 325 nurses responded to the questionnaires. Their mean age was 30.94 years (SD: 6.67), while the average years in the current organisation and the nursing profession were 4.65 years and 8.92 years, respectively. The majority of the respondents were female (74.8%), unmarried (66.8%) and held an SBN degree (82.2%). Regarding preparedness to care for COVID-19 patients, 28 (8.6%) were 'prepared', 104 (32%) were 'somewhat prepared', and nearly half (45.2%) were 'unsure'. When asked if they were willing to care for COVID-19 patients, 26.8% answered 'probably yes', 20.3% answered 'absolutely yes', and a greater proportion were 'unsure' (35.7%) or 'not willing' (17.2%). The detailed characteristics of nurses are presented in **Table 1**.

Based on the cut-off score of  $\geq 9.0$  in the COVID-19 Anxiety Scale (Lee *et al.*, 2020), 123 respondents (37.8% 123) were identified to have dysfunctional levels of anxiety. The composite score of the scale was 8.440 (SD: 4.32), with ‘tonic immobility’ (1.779) as the highest-rated item, followed by ‘sleep disturbance’ (1.726) and ‘dizziness’ (1.655). The mean scale scores of the resilience, social support and organisational support scales were 4.190, 3.955 and 3.803, respectively (**Table 2**).

Bivariate analysis showed no significant relationship between nurses’ variables and the composite score of the COVID-19 Anxiety Scale (**Table 3**). Pearson’s correlation analysis revealed a significant negative relationship between COVID-19 anxiety and personal resilience ( $r = -0.217, p > 0.001$ ), social support ( $r = -0.208, p > 0.001$ ) and organisational support ( $r = -0.187, p > 0.001$ ).

Based on multiple linear regression analyses, social support ( $\beta = -0.142, p = 0.011$ ), personal resilience ( $\beta = -0.151, p = 0.008$ ) and organisational support ( $\beta = -0.127, p = 0.023$ ) predicted COVID-19 anxiety. Each unit of decrease in the mean scale score of the social support, organisational support and personal resilience questionnaires was associated with increased COVID-19 anxiety by 0.52, 0.94 and 0.63 points, respectively (**Table 4**).

## Discussion

This study was conducted to examine the roles of personal resilience, organisational support and social support in predicting COVID-19 anxiety among nurses. Using a cut-off score of  $\geq 9.0$  on the COVID-19 Anxiety Scale, 37.8% of the respondents were identified to have dysfunctional levels of anxiety. Due to the apparent lack of studies using similar tools in which nurses were the participants, comparison with highly similar studies was not possible. However,



the proportion of participants in this study who experienced dysfunctional levels of COVID-19 anxiety was lower than in the general population (54.8%; Lee *et al.*, 2020). This may be due to the fact that nurses have wider knowledge of the nature of COVID-19, its transmission and symptoms and measures to prevent the disease than the general population, which could contribute to the lower anxiety levels. Since nurses are directly involved in the care of COVID-19 patients and in the delivery of healthcare services, it is essential to implement measures to reduce anxiety levels among nurses, as dysfunctional anxiety levels have been identified as a strong precursors of psychological distress, depression and other psychological disorders (Teles, Barbosa, & Vargas, 2014; Mo *et al.*, 2020).

Interestingly, more than 90% of nurses reported that they were not fully prepared to manage COVID-19 patients, and only 20.3% reported being willing to care for COVID-19 patients. The proportion of nurses who expressed their willingness to manage patients affected by the COVID-19 outbreak was lower compared to previous studies in which more than 75% of nurses expressed their willingness to care for patients affected by infectious disease such as H1N1 and Ebola (MnMullan *et al.*, 2016; Bugade *et al.*, 2018). In addition, this study confirms earlier studies in which many nurses reported not being sufficiently prepared to handle patients affected by infectious disease (e.g. Ebola, H1N1; MnMullan *et al.*, 2016; Bugade *et al.*, 2018) or respond to emergency and disaster situations (Labrague *et al.*, 2018b; Labrague *et al.*, 2016; Tzeng *et al.*, 2016). The results of this study highlight the need for nurses to be fully equipped with the required competencies to better handle and manage patients affected by disease outbreaks and in emergency situations. With regard to COVID-19, this can be accomplished by providing nurses with relevant trainings, mock drills in handling COVID-19 patients and COVID-19 simulation activities.

Anxiety, a response to real or perceived threatening events or situations, can be manifested in different ways, including loss of appetite, dizziness, sleep disturbance, nausea and vomiting and cognitive impairment (Lee *et al.*, 2020). These symptoms can range from relatively nonthreatening to much more harmful manifestations (McGrandles & Duffy, 2012). In this study, among the different symptoms of coronavirus anxiety, ‘tonic mobility’ and ‘sleep disturbance’ were reported to be the most pronounced symptoms. This result is similar to those of a study involving the general population in Poland in which both items obtained the highest means (Skalski *et al.*, 2020), while in a study by Shelvin *et al.* (2020), high levels of anxiety were linked to somatic symptoms such as fatigue and gastrointestinal manifestations. Accordingly, ‘tonic mobility’ and ‘sleep disturbance’ were identified in the literature as the most common responses to threatening events or situations. Sleep disturbance is a symptom common among individuals who have post-traumatic stress disorder and anxiety disorder (APA, 2013), while tonic immobility occurs involuntarily as a result of heightened fear and typically happens in individuals who experience highly traumatic situations (Moller *et al.*, 2017).

The most important findings of this study were the significant direct effects of personal resilience, social support and organisational support on COVID-19 anxiety levels in nurses above and beyond the influence of nurse characteristics. To author’s knowledge, this study is the first to confirm such relationships; thus, the study contributes knowledge to the nursing literature on this important topic. First, the reduced COVID-19 anxiety levels in nurses who had higher scores on the resilience scale demonstrate the protective role of personal resilience, which enables an individual to positively adapt in stressful and anxiety-provoking situations and bounce back successfully despite adverse circumstances (Foster *et al.*, 2019). This result highlights the importance of developing measures or interventions to promote or optimise personal resilience in

frontline nurses in order to reduce their anxiety related to COVID-19. This result is in line with previous studies linking higher resilience in nurses to reduced burnout, compassion fatigue, anxiety, depression and psychological distress (Mealer *et al.*, 2017; Cooper *et al.*, 2020). Higher resilience was also associated with enhanced outcomes in an individual, such as increased psychological health and mental well-being (Foster *et al.*, 2020; Gao *et al.*, 2017). In a literature review by De Brier *et al.* (2020), maximising resilience in HCWs during the COVID-19 crisis was seen as vital to assist them in safeguarding their mental and psychological health and well-being. This pattern of influence was similar to that of findings in a general population, in which personal resiliency and social support contributed significantly to reducing the severity of anxiety associated with the novel coronavirus (Skalski *et al.*, 2020).

Available literature has identified social support that originates from colleagues, friends and families as effective support systems in nurses. Such support systems are essential when facing anxiety-provoking events. In this study, increased scores in the social support scale were associated with significantly lower COVID-19 Anxiety Scale scores. This result corroborates previous studies underlining the vital role of adequate social support in helping nurses achieve positive emotional states during stressful events such as disease outbreaks (Li & Aungsuroch, 2019). In a study involving doctors and nurses, higher scores on the social support scale were negatively associated with anxiety, depression and sleep disorders, suggesting that psychological symptoms of healthcare staff could be eased by enhancing social support during the COVID-19 pandemic (Zou *et al.*, 2020). Further, positive coping strategies and increased social support were attributed to decreased psychological distress, increased self-efficacy, improved sleep quality and decreased levels of anxiety and stress among nurses (Yu *et al.*, 2020; Xiao *et al.*, 2020).

Finally, an increased score on the organisational support measure was associated with decreased scores in the COVID-19 Anxiety Scale. This result was expected, as adequate organisational support, or the degree to which the organisation recognises the employees and values their well-being, has been associated with increased nurse job performance and commitment, which are vital when dealing with a disease outbreak (Shiao *et al.*, 2007; Jung *et al.*, 2020). Further, when nurses' perceived greater support from the organisation, they were more motivated, highly satisfied and experienced less stress when carrying out their duties (Higazee *et al.*, 2016; Labrague *et al.*, 2019c). This result suggests that during disease outbreaks such as the COVID-19 pandemic, when stress and anxiety is high, providing adequate organisational support (e.g. structural support, efficient communication, provision of a safe work environment, relevant trainings related to COVID-19, monitoring of HCWs' health and well-being) are vital to assist nurses facing the different challenges brought about by the coronavirus crisis.

## **Study Limitations**

While this study provides evidence important for nursing administrators to assist nurses during pandemics, a few limitations were identified. Since this study involved nurses from only one province of the Philippines, results cannot be generalised to nurses throughout the country or the world. Next, the nature of the study design poses some limitations; for example, establishing causal links between variables may not be possible. The use of self-reported measures may have limited the responses of the participants; therefore, future studies may utilise both qualitative and quantitative designs to elicit essential information from the participants that could not have been captured by the scales used. Further, future studies utilising rigorous methods (e.g. experimental

research design) may be conducted to examine and test the effectiveness of a resilience program and other initiatives to increase social and organisational support in reducing coronavirus anxiety in nurses. Finally, future research should explore how personal (e.g. self-efficacy, coping skills, hardiness) and organisational (adequacy of healthcare staffing, adequacy of hospital resources, number of patients admitted, hospital size) variables affect coronavirus anxiety in nurses.

### **Implication for Nursing Management**

Since excessive COVID-19 anxiety may have negative effects on nurses' mental health and well-being, provision of adequate mental and psychological support should be prioritised by healthcare administrators, who should institute evidence-based measures to promote the mental health of nurses during the COVID-19 pandemic. This can be accomplished by giving nurses access to psychological treatment or psychotherapy and materials and resources to support mental health. Further, anxiety is often caused by a lack of accurate information regarding the disease and may be addressed by providing nurses with recent and updated information regarding the disease. Promoting self-care among nurses, by giving flexible or shorter duty hours, adequate breaks and time scheduling, for example, may help reduce the negative impact of the crisis and reduce the nurses' anxiety.

Since higher personal resilience was associated with lower COVID-19 anxiety, building personal resilience among frontline nurses should be prioritised (Wei *et al.*, 2019, Kester & Wei, 2018; Cooper *et al.*, 2020). By reinforcing positive coping strategies and supporting nurses' self-efficacy, hospitals can better promote resilience among nursing staff (Hudgins, 2016). Previous studies identified work-based educational interventions valuable in developing and strengthening personal resilience in nurses, which is essential when dealing with workplace adversity and

stressful work situations such as disease outbreaks or pandemics (Henshall *et al.*, 2020; McDonald *et al.*, 2013; Davey *et al.*, 2020).

Social support, such as support originating from colleagues, friends and families, may help provide a sense of security in nurses and help alleviate their fears during a pandemic. Through sharing of work experiences, listening to their concerns and offering empathetic support, nurses' mental health and psychological well-being will be supported and their morale will be improved (Maben & Bridges, 2020). Support from the organisation through the implementation of a safe workplace environment, provision of complete and quality PPE and supplies to prevent infection, provision of accurate and timely information regarding the disease and implementation of relevant trainings related to COVID-19 is critically important to support nurses in their nursing practices and protect both their physical and mental health. Further, nursing associations in the country are strategically positioned to support the healthcare system in fighting the disease by provide resources related to the disease, including up-to-date evidence on COVID-19 management and prevention, provision of mental health services for nurses and the provision of trainings to promote resilience and prevent stress among nurses.

## **Conclusion**

The COVID-19 pandemic may cause dysfunctional levels of anxiety in frontline nurses. Further, more than 90% of nurses reported not being fully prepared to manage COVID-19 patients, and only 20.3% reported being willing to care for COVID-19 patients. Highly resilient nurses and nurses who perceived greater organisational and social support tended to report lower levels of anxiety related to the COVID-19 pandemic. Measures to enhance personal resilience and increase social and organisational support in nurses may reduce their anxiety related to the

COVID-19 pandemic. This is critically important for nurses to effectively manage and care for patients affected by the pandemic.

## References

- Alwani, S. S., Majeed, M. M., Hirwani, M. Z., Rauf, S., Saad, S. M., Shah, S. H., & Hamirani, F. M. (2020). Evaluation of Knowledge, Practices, Attitude and Anxiety of Pakistans Nurses towards COVID-19 during the Current Outbreak in Pakistan. *medRxiv*. Ahead of Print <https://doi.org/10.1101/2020.06.05.20123703>
- Baduge, M. S. P., Morphet, J., & Moss, C. (2018). Emergency nurses' and department preparedness for an ebola outbreak: A (narrative) literature review. *International Emergency Nursing*, 38, 41-49.
- Cooper, A. L., Brown, J. A., Rees, C. S., & Leslie, G. D. (2020). Nurse resilience: A concept analysis. *International Journal of Mental Health Nursing*.
- Catton, H. (2020). Global challenges in health and health care for nurses and midwives everywhere. *International Nursing Review*, 67(1), 4-6.
- Davey, Z., Henshall, C., & Jackson, D. The value of nurse mentoring relationships: Lessons learnt from a work-based resilience enhancement programme for nurses working in the forensic setting. *International Journal of Mental Health Nursing*. Ahead of Print <https://doi.org/10.1111/inm.12739>
- Department of Health (2020). UPDATES ON NOVEL CORONAVIRUS DISEASE (COVID-19) Retrieved from: <https://www.doh.gov.ph/2019-nCoV>
- De Brier, N., Stroobants, S., Vandekerckhove, P., & De Buck, E. (2020, April 23). Factors affecting mental health of health care workers during coronavirus disease outbreaks: a rapid systematic review. *PsyArXiv* <https://doi.org/10.31234/osf.io/w9uux>
- Eisenberger R, Huntington R, Hutchison S, Sowa D. (1987). Perceived organizational support. *J Appl Psychol*. 71, 500– 507.
- Foster, K., Roche, M., Giandinoto, J. & Furness, T. (2020). Workplace stressors, psychological well-being, resilience, and caring behaviours of mental health nurses: A descriptive correlational study. *International Journal of Mental Health Nursing*, 29 (1), 56– 68.

- Gao, T., Ding, X., Chai, J. *et al.* (2017). The influence of resilience on mental health: The role of general well-being. *International Journal of Nursing Practice*, **23** (3), e12535.
- Henshall, C., Davey, Z., & Jackson, D. (2020). The implementation and evaluation of a resilience enhancement programme for nurses working in the forensic setting. *International Journal of Mental Health Nursing*, *29*(3), 508-520.
- Higazee, M. Z. A., Rayan, A., & Khalil, M. (2016). Relationship between job stressors and organizational support among Jordanian nurses. *American Journal of Nursing Research*, *4*(3), 51-55.
- Jung, H., Jung, S. Y., Lee, M. H., & Kim, M. S. (2020). Assessing the Presence of Post-Traumatic Stress and Turnover Intention Among Nurses Post–Middle East Respiratory Syndrome Outbreak: The Importance of Supervisor Support. *Workplace health & safety*, Ahead of print <https://doi.org/10.1177%2F2165079919897693>
- Kester, K., & Wei, H. (2018). Building nurse resilience. *Nursing management*, *49*(6), 42-45.
- Kaveh, M., Davari-tanha, F., Varaei, S., Shirali, E., Shokouhi, N., Nazemi, P., ... & Ashraf, M. A. (2020). Anxiety levels among Iranian health care workers during the COVID-19 surge: A cross-sectional study. *medRxiv*. Ahead of Print <https://doi.org/10.1101/2020.05.02.20089045>
- Labrague, L. J., & McEnroe–Petitte, D. M. (2018a). Job stress in new nurses during the transition period: an integrative review. *International Nursing Review*, *65*(4), 491-504.
- Labrague, L. J., Hammad, K., Gloe, D. S., McEnroe–Petitte, D. M., Fronda, D. C., Obeidat, A. A., ... & Mirafuentes, E. C. (2018b). Disaster preparedness among nurses: a systematic review of literature. *International Nursing Review*, *65*(1), 41-53.
- Labrague, L. J., McEnroe–Petitte, D. M., Leocadio, M. C., Van Bogaert, P., & Tsaras, K. (2018c). Perceptions of organizational support and its impact on nurses' job outcomes. *Nursing Forum*, *53*(3), 339-347.
- Labrague, L. J., Yboa, B. C., McEnroe–Petitte, D. M., Loblino, L. R., & Brennan, M. G. B. (2016). Disaster preparedness in Philippine nurses. *Journal of Nursing Scholarship*, *48*(1), 98-105.
- Lee, S. A. (2020). Coronavirus Anxiety Scale: A brief mental health screener for COVID-19 related anxiety. *Death Studies*, *44*(7), 393-401.



- Lee, S. A., Mathis, A. A., Jobe, M. C., & Pappalardo, E. A. (2020). Clinically significant fear and anxiety of COVID-19: A psychometric examination of the Coronavirus Anxiety Scale. *Psychiatry Research*, 113112.
- Liu, Y., Gayle, A. A., Wilder-Smith, A., & Rocklöv, J. (2020). The reproductive number of COVID-19 is higher compared to SARS coronavirus. *Journal of Travel Medicine*, 27(2), 1-4.
- Liu, Y., & Aunguroch, Y. (2019). Work stress, perceived social support, self-efficacy and burnout among Chinese registered nurses. *Journal of Nursing Management*, 27(7), 1445-1453.
- Lin, M., Hirschfeld, G., & Margraf, J. (2019). Brief form of the Perceived Social Support Questionnaire (F-SozU K-6): Validation, norms, and cross-cultural measurement invariance in the USA, Germany, Russia, and China. *Psychological Assessment*, 31(5), 609-621.
- Luo, M., Guo, L., Yu, M., & Wang, H. (2020). The Psychological and Mental Impact of Coronavirus Disease 2019 (COVID-19) on Medical Staff and General Public—A Systematic Review and Meta-analysis. *Psychiatry Research*, 113190.
- Lv, Y., Yao, H., Xi, Y., Zhang, Z., Zhang, Y., Chen, J., ... & Luo, G. Q. (2020). Social Support Protects Chinese Medical Staff from Suffering Psychological Symptoms in COVID-19 Defense. SSRN, <https://dx.doi.org/10.2139/ssrn.3559617>
- Maben, J., & Bridges, J. (2020). Covid-19: Supporting nurses' psychological and mental health. *Journal of Clinical Nursing*. Ahead of Print <https://doi.org/10.1111/jocn.15307>
- Marx, B. P., Forsyth, J. P., Gallup, G. G., Fusé, T., & Lexington, J. M. (2008). Tonic immobility as an evolved predator defense: Implications for sexual assault survivors. *Clinical Psychology: Science and Practice*, 15(1), 74-90.
- McGrandles, A., & Duffy, T. (2012). Assessment and treatment of patients with anxiety. *Nursing Standard*, 26(35), 48-58.
- McDonald, G., Jackson, D., Wilkes, L., & Vickers, M. (2013). Personal resilience in nurses and midwives: effects of a work-based educational intervention. *Contemporary Nurse*, 45(1), 134-143.

- McMullan, C., Brown, G. D., & O'Sullivan, D. (2016). Preparing to respond: Irish nurses' perceptions of preparedness for an influenza pandemic. *International Emergency Nursing*, 26, 3-7.
- Mealer, M., Jones, J., & Meek, P. (2017). Factors affecting resilience and development of posttraumatic stress disorder in critical care nurses. *American Journal of Critical Care*, 26(3), 184-192.
- Möller, A., Söndergaard, H. P., & Helström, L. (2017). Tonic immobility during sexual assault—a common reaction predicting post-traumatic stress disorder and severe depression. *Acta obstetricia et gynecologica Scandinavica*, 96(8), 932-938.
- Mo, Y., Deng, L., Zhang, L., Lang, Q., Liao, C., Wang, N., ... & Huang, H. (2020). Work stress among Chinese nurses to support Wuhan in fighting against COVID-19 epidemic. *Journal of Nursing Management*. Ahead of Print <https://doi.org/10.1111/jonm.13014>
- Pappa, S., Ntella, V., Giannakas, T., Giannakoulis, V. G., Papoutsis, E., & Katsaounou, P. (2020). Prevalence of depression, anxiety, and insomnia among healthcare workers during the COVID-19 pandemic: A systematic review and meta-analysis. *Brain, Behavior, and Immunity*. Ahead of Print <https://doi.org/10.1016/j.bbi.2020.05.026>
- Shanafelt, T., Ripp, J., & Trockel, M. (2020). Understanding and addressing sources of anxiety among health care professionals during the COVID-19 pandemic. *Jama*, 323(21), 2133-2134.
- Shiao, J. S. C., Koh, D., Lo, L. H., Lim, M. K., & Guo, Y. L. (2007). Factors predicting nurses' consideration of leaving their job during the SARS outbreak. *Nursing Ethics*, 14(1), 5-17.
- Skalski, S., Uram, P., Dobrakowski, P., & Kwiatkowska, A. (2020). The Link Between Ego-resiliency, Social Support, SARS-CoV-2 Anxiety and Trauma Effects. Polish Adaptation of the Coronavirus Anxiety Scale.
- Shevlin, M., Nolan, E., Owczarek, M., McBride, O., Murphy, J., Gibson Miller, J., ... & McKay, R. (2020). COVID-19-related anxiety predicts somatic symptoms in the UK population. *British Journal of Health Psychology*. Ahead of Print <https://doi.org/10.1111/bjhp.12430>

- Smith, B. W., Dalen, J., Wiggins, K., Tooley, E., Christopher, P., & Bernard, J. (2008). The brief resilience scale: assessing the ability to bounce back. *International journal of behavioral medicine*, 15(3), 194-200.
- Soper DS. (2020). A-priori sample size calculator for multiple regression. Retrieved from <http://www.danielsoper.com/statcalc/calculator.aspx?id=1>.
- Spielberger, C. D. (2010). State-Trait anxiety inventory. *The Corsini Encyclopedia of Psychology*, 1-1.
- Teles, M. A. B., Barbosa, M. R., Vargas, A. M. D., Gomes, V. E., e Ferreira, E. F., de Barros Lima, A. M. E., & Ferreira, R. C. (2014). Psychosocial work conditions and quality of life among primary health care employees: a cross sectional study. *Health and Quality of Life Outcomes*, 12(1), 72.
- Wei, H., Roberts, P., Strickler, J., & Corbett, R. W. (2019). Nurse leaders' strategies to foster nurse resilience. *Journal of Nursing Management*, 27(4), 681-687.
- World Health Organization (2020, March20). *Coronavirus disease 2019 (COVID-19) situation report* 60[EB/OL]. Retrieved from <https://www.who.int/emergencies/diseases/novel-coronavirus-2019/situation-reports>
- Xiao, H., Zhang, Y., Kong, D., Li, S., & Yang, N. (2020). The effects of social support on sleep quality of medical staff treating patients with coronavirus disease 2019 (COVID-19) in January and February 2020 in China. *Medical Science Monitor: International Medical Journal of Experimental and Clinical Research*, 26, e923549-1.
- Yu, H., Li, M., Li, Z., Xiang, W., Yuan, Y., Liu, Y., ... & Xiong, Z. (2020). Coping style, social support and psychological distress in the general Chinese population in the early stages of the COVID-2019 epidemic. Social Support and Psychological Distress in the General Chinese Population in the Early Stages of the COVID-2019 Epidemic. *SSRN*. <https://dx.doi.org/10.2139/ssrn.3556633>
- Zhu, J., Sun, L., Zhang, L., Wang, H., Fan, A., Yang, B., ... & Xiao, S. (2020). Prevalence and Influencing Factors of Anxiety and Depression Symptoms in the First-Line Medical Staff Fighting Against COVID-19 in Gansu. *Frontiers in Psychiatry*, Ahead of Print <https://dx.doi.org/10.3389/fpsy.2020.00386>

Zautra A, Hall J, Murray K (2010) Resilience: a new definition of health for people and communities. In Reich J, Zautra A, Hall J (Eds) Handbook of Adult Resilience. Guilford, New York, 3-34.

**Table 1. Staff, unit, and hospital characteristics (*n* = 325)**

| Characteristics                              | Categories          | Mean     | SD       |
|----------------------------------------------|---------------------|----------|----------|
| Age                                          |                     | 30.94    | 6.76     |
| Year in Nursing Profession                   |                     | 8.92     | 7.48     |
| Year in Present Organization                 |                     | 4.65     | 4.96     |
|                                              |                     | <b>N</b> | <b>%</b> |
| Gender                                       | Male                | 82       | 25.2     |
|                                              | Female              | 243      | 74.8     |
| Marital status                               | Married             | 108      | 33.2     |
|                                              | Unmarried           | 217      | 66.8     |
| Education                                    | BSN                 | 267      | 82.2     |
|                                              | MA/MS               | 58       | 17.8     |
| Job role                                     | Staff Nurses        | 257      | 79.1     |
|                                              | Nurse Managers      | 68       | 20.9     |
| Job status                                   | Fulltime            | 305      | 93.8     |
|                                              | Part-time           | 20       | 6.2      |
| Hospital facility size                       | <100 beds           | 94       | 28.9     |
|                                              | 101-250 beds        | 142      | 43.7     |
|                                              | >250 beds           | 89       | 27.4     |
| Preparedness to care for COVID-19 patient(s) | Unprepared          | 12       | 3.7      |
|                                              | Somewhat unprepared | 34       | 10.5     |
|                                              | Unsure              | 147      | 45.2     |
|                                              | Somewhat prepared   | 104      | 32.0     |
|                                              | Prepared            | 28       | 8.6      |
| Willingness to care for COVID-19 patient(s)  | Absolutely not      | 31       | 9.5      |
|                                              | Probably not        | 25       | 7.7      |
|                                              | Unsure              | 116      | 35.7     |
|                                              | Probably yes        | 87       | 26.8     |
|                                              | Absolutely yes      | 66       | 20.3     |
| COVID-19 Anxiety                             | ≥ 9.0*              | 123      | 37.8     |
|                                              | ≤ 8.9               | 202      | 62.2     |

\*cut off score for dysfunctional level of anxiety

**Table 2. Descriptive statistics of the key study variables**

| Scale/Subscale                      | N   | Min  | Max   | Mean  | SD    |
|-------------------------------------|-----|------|-------|-------|-------|
| COVID-19 Anxiety <sup>†</sup>       | 325 | 5.00 | 37.00 | 8.440 | 4.326 |
| Dizziness <sup>‡</sup>              | 325 | 1.00 | 5.00  | 1.655 | 0.919 |
| Sleep Disturbance <sup>‡</sup>      | 325 | 1.00 | 5.00  | 1.726 | 1.028 |
| Tonic Immobility <sup>‡</sup>       | 325 | 1.00 | 5.00  | 1.779 | 1.027 |
| Appetite Loss <sup>‡</sup>          | 325 | 1.00 | 5.00  | 1.643 | 0.989 |
| Abdominal Distress <sup>‡</sup>     | 325 | 1.00 | 5.00  | 1.637 | 0.974 |
| Resilience <sup>†</sup>             | 325 | 1.00 | 5.00  | 4.190 | 0.687 |
| Social Support <sup>†</sup>         | 325 | 1.00 | 5.00  | 3.955 | 0.761 |
| Organizational Support <sup>†</sup> | 325 | 1.00 | 5.00  | 3.803 | 0.877 |

<sup>†</sup> mean scale score

<sup>‡</sup> mean item score

**Table 3. Correlations between key study variables**

| Characteristics                                           | Categories     | Mean   | SD    | Test Statistics | P value |
|-----------------------------------------------------------|----------------|--------|-------|-----------------|---------|
| Gender <sup>‡</sup>                                       | Male           | 7.902  | 4.051 | -1.302          | 0.194   |
|                                                           | Female         | 8.621  | 4.409 |                 |         |
| Marital status <sup>‡</sup>                               | Married        | 8.870  | 4.911 | 1.266           | 0.206   |
|                                                           | Unmarried      | 8.226  | 4.000 |                 |         |
| Education <sup>‡</sup>                                    | BSN            | 8.251  | 4.309 | -1.695          | 0.091   |
|                                                           | MA/MS          | 9.310  | 4.342 |                 |         |
| Job role <sup>‡</sup>                                     | Staff Nurses   | 8.432  | 4.349 | -0.065          | 0.948   |
|                                                           | Nurse Managers | 8.471  | 4.276 |                 |         |
| Job status <sup>‡</sup>                                   | Fulltime       | 8.315  | 4.279 | -1.880          | 0.074   |
|                                                           | Part-time      | 10.350 | 4.716 |                 |         |
| Hospital facility size <sup>§</sup>                       | <100 beds      | 8.096  | 4.164 | 1.818           | 0.164   |
|                                                           | 101-250 beds   | 8.204  | 4.310 |                 |         |
|                                                           | >250 beds      | 9.180  | 4.481 |                 |         |
| Age <sup>†</sup>                                          |                |        |       | 0.101           | 0.068   |
| Year in Nursing Profession <sup>†</sup>                   |                |        |       | 0.045           | 0.416   |
| Year in Present Organization <sup>†</sup>                 |                |        |       | 0.041           | 0.463   |
| Preparedness to care for COVID-19 patient(s) <sup>†</sup> |                |        |       | -0.084          | 0.130   |
| Willingness to care                                       |                |        |       | -0.096          | 0.112   |

|                                      |        |       |
|--------------------------------------|--------|-------|
| for COVID-19 patient(s) <sup>†</sup> |        |       |
| Resilience <sup>†</sup>              | -0.217 | 0.001 |
| Social Support <sup>†</sup>          | -0.208 | 0.001 |
| Organizational Support <sup>†</sup>  | -0.187 | 0.001 |

\* $p < 0.05$ , \*\* $p < 0.01$ , \*\*\*  $p < 0.001$   
<sup>†</sup>Pearson r correlation  
<sup>‡</sup>t-test for independent group  
<sup>§</sup>Analysis of Variance

**Table 4. Influence of social support, resilience, and organizational support on COVID-19 Anxiety**

| Predictors             | B      | SE    | $\beta$ | t      | <i>p</i> value | CI               |
|------------------------|--------|-------|---------|--------|----------------|------------------|
| Constant               | 16.577 | 1.598 |         | 10.375 | 0.001          | 13.433 to 19.720 |
| Social Support         | -0.523 | 0.203 | -0.142  | -2.572 | 0.011          | -0.923 to -0.123 |
| Resilience             | -0.947 | 0.356 | -0.151  | -2.662 | 0.008          | -1.647 to -0.247 |
| Organizational Support | -0.628 | 0.274 | -0.127  | -2.291 | 0.023          | -1.116 to -0.089 |

**Note:**

Controlling for nurse/unit/hospital characteristics (age, year in the present unit, year in the organization, marital status, education, job role, facility size, hospital type)

$\beta$ , Standardized Regression Coefficient; SE, Standard Error; CI, Confidence Interval

<sup>§</sup>Composite score

\* $p < 0.05$ , \*\* $p < 0.01$ , \*\*\*  $p < 0.001$

$R^2 = 7.6\%$ ,  $F = 0.001$ ,  $p < 0.001$
